# Supplementary material for: Fostering creativity to design biodiversity-based cropping systems that consider the long term: a participatory framework
Source: Frontiers journal article supplement (doi:10.3389/fagro.2025.1601337), 2025-08-08
Supplement: Data_Sheet_1.pdf [file Data_Sheet_1.pdf]

## Appendix 1

Supplemental information for: **Fostering creativity to design biodiversity-based cropping systems that consider the long term: a participation framework**

**Table A1.1:** Inventory of the 97 plant functional traits utilized for preliminary crop choice in the perspective of co-designed workshop, detailing ecosystem services influenced by each trait

| Plant Traits                                                     | Plant part  | Services enhanced by the traits                   | Sources                       |
|------------------------------------------------------------------|-------------|---------------------------------------------------|-------------------------------|
| Ability to fix atmospheric N                                     | Belowground | Supply of nutrients for agroecosystem functioning | Freschet and al., 2021        |
| Ability to mycorrhizal symbiosis                                 | Belowground | Supply of nutrients for agroecosystem functioning | Freschet and al., 2021        |
| Ability to mycorrhizal symbiosis                                 | Belowground | Regulation of water balance for crop development  | Freschet and al., 2021        |
| Ability to mycorrhizal symbiosis                                 | Belowground | Pest control                                      | Freschet and al., 2021        |
| Ability to produce secondary metabolite (such as alkaloids etc.) | Aboveground | Pest control                                      | Freschet and al., 2021        |
| Ability to produce secondary metabolite (such as alkaloids etc.) | Aboveground | Pest control                                      | Freschet and al., 2021        |
| Ability to produce secondary metabolite (such as alkaloids etc.) | Belowground | Pest control                                      | Freschet and al., 2021        |
| Ability to produce secondary metabolite (such as alkaloids etc.) | Belowground | Pest control                                      | Freschet and al., 2021        |
| Ability to produce storage structure                             | Belowground | Food provision                                    | Freschet and al., 2021        |
| Biomass                                                          | Belowground | Regulation of greenhouse gases                    | Freschet and al., 2021        |
| Biomass                                                          | Aboveground | Regulation of greenhouse gases                    | Miedema Brown and Anand, 2022 |
| Biomass                                                          | Belowground | Supply of nutrients for agroecosystem functioning | Freschet and al., 2021        |
| Biomass                                                          | Aboveground | Supply of nutrients for agroecosystem functioning | Miedema Brown and Anand, 2022 |
| Coverage rate                                                    | Aboveground | Supply of nutrients for agroecosystem functioning | Miedema Brown and Anand, 2022 |
| Fine roots %                                                     | Belowground | Erosion control                                   | Freschet and al., 2021        |
| Flower color                                                     | Aboveground | Maintenance of associated biodiversity            | Miedema Brown and Anand, 2022 |
| Flower size                                                      | Aboveground | Maintenance of associated biodiversity            | Miedema Brown and Anand, 2022 |
| Flower type                                                      | Aboveground | Maintenance of associated biodiversity            | Miedema Brown and Anand, 2022 |
| Fruit/seed C content                                             | Aboveground | Food provision                                    | Miedema Brown and Anand, 2022 |
| Fruit/seed C:N content                                           | Aboveground | Food provision                                    | Miedema Brown and Anand, 2022 |
| Fruit/seed composition                                           | Aboveground | Food provision                                    | Miedema Brown and Anand, 2023 |
| Fruit/seed mass                                                  | Aboveground | Food provision                                    | Miedema Brown and Anand, 2022 |
| Fruit/seed N content                                             | Aboveground | Food provision                                    | Miedema Brown and Anand, 2022 |
| Horizontal and vertical root distribution                        | Belowground | Supply of nutrients for agroecosystem functioning | Freschet and al., 2021        |
| Leaf area                                                        | Aboveground | Supply of nutrients for agroecosystem functioning | Miedema Brown and Anand, 2022 |
| Leaf area                                                        | Aboveground | Regulation of greenhouse gases                    | Miedema Brown and Anand, 2022 |
| Leaf area                                                        | Aboveground | Regulation of water balance for crop development  | Miedema Brown and Anand, 2022 |

|                                 |             |                                                   |                               |
|---------------------------------|-------------|---------------------------------------------------|-------------------------------|
| Leaf area index                 | Aboveground | Supply of nutrients for agroecosystem functioning | Miedema Brown and Anand, 2022 |
| Leaf area index                 | Aboveground | Regulation of water balance for crop development  | Miedema Brown and Anand, 2022 |
| Leaf C content                  | Aboveground | Supply of nutrients for agroecosystem functioning | Miedema Brown and Anand, 2022 |
| Leaf C content                  | Aboveground | Food provision                                    | Miedema Brown and Anand, 2022 |
| Leaf C:N ratio                  | Aboveground | Supply of nutrients for agroecosystem functioning | Miedema Brown and Anand, 2022 |
| Leaf C:N ratio                  | Aboveground | Regulation of water balance for crop development  | Miedema Brown and Anand, 2022 |
| Leaf cover/Foliage architecture | Aboveground | Regulation of water balance for crop development  | Miedema Brown and Anand, 2022 |
| Leaf cover/Foliage architecture | Aboveground | Maintenance of associated biodiversity            | Miedema Brown and Anand, 2022 |
| Leaf cover/Foliage architecture | Aboveground | Food provision                                    | Miedema Brown and Anand, 2022 |
| Leaf cover/Foliage architecture | Aboveground | Weed control                                      | Miedema Brown and Anand, 2022 |
| Leaf density                    | Aboveground | Regulation of water balance for crop development  | Miedema Brown and Anand, 2022 |
| Leaf density                    | Aboveground | Supply of nutrients for agroecosystem functioning | Miedema Brown and Anand, 2022 |
| Leaf density                    | Aboveground | Erosion control                                   | Miedema Brown and Anand, 2022 |
| Leaf density                    | Aboveground | Weed control                                      | Miedema Brown and Anand, 2022 |
| Leaf dry matter content         | Aboveground | Food provision                                    | Miedema Brown and Anand, 2022 |
| Leaf dry matter content         | Aboveground | Supply of nutrients for agroecosystem functioning | Miedema Brown and Anand, 2022 |
| Leaf dry matter content         | Aboveground | Regulation of water balance for crop development  | Miedema Brown and Anand, 2022 |
| Leaf N content                  | Aboveground | Supply of nutrients for agroecosystem functioning | Miedema Brown and Anand, 2022 |
| Leaf N content                  | Aboveground | Food provision                                    | Miedema Brown and Anand, 2022 |
| Leaf P content                  | Aboveground | Supply of nutrients for agroecosystem functioning | Miedema Brown and Anand, 2022 |
| Leaf pubescence                 | Aboveground | Pest control                                      | Miedema Brown and Anand, 2022 |
| Leaf thickness                  | Aboveground | Pest control                                      | Miedema Brown and Anand, 2022 |
| Leaf thickness                  | Aboveground | Regulation of water balance for crop development  | Miedema Brown and Anand, 2022 |
| Leaf thickness                  | Aboveground | Supply of nutrients for agroecosystem functioning | Miedema Brown and Anand, 2022 |
| Leaf toughness                  | Aboveground | Pest control                                      | Miedema Brown and Anand, 2022 |
| Lignin content                  | Aboveground | Supply of nutrients for agroecosystem functioning | Miedema Brown and Anand, 2022 |
| Lignin content                  | Aboveground | Pest control                                      | Miedema Brown and Anand, 2022 |
| Lignin content                  | Belowground | Supply of nutrients for agroecosystem functioning | Freschet and al., 2021        |
| Lignin content                  | Belowground | Pest control                                      | Freschet and al., 2021        |
| Lignin content                  | Belowground | Supply of nutrients for agroecosystem functioning | Freschet and al., 2021        |
| Lignin content                  | Belowground | Pest control                                      | Freschet and al., 2021        |
| Nitrogen fixation rate          | Belowground | Supply of nutrients for agroecosystem functioning | Freschet and al., 2021        |
| Nitrophilicity                  | Belowground | Supply of nutrients for agroecosystem functioning | Freschet and al., 2021        |
| Plant height                    | Aboveground | Weed control                                      | Miedema Brown and Anand, 2022 |
| Plant height                    | Aboveground | Supply of nutrients for agroecosystem functioning | Miedema Brown and Anand, 2022 |
| Plant height                    | Aboveground | Food provision                                    | Miedema Brown and Anand, 2022 |
| Plant height                    | Aboveground | Regulation of greenhouse gases                    | Miedema Brown and Anand, 2022 |

|                                              |             |                                                   |                        |
|----------------------------------------------|-------------|---------------------------------------------------|------------------------|
| Ration shoot:root                            | Belowground | Supply of nutrients for agroecosystem functioning | Freschet and al., 2021 |
| Root branching density                       | Belowground | Regulation of water balance for crop development  | Freschet and al., 2021 |
| Root C content                               | Belowground | Supply of nutrients for agroecosystem functioning | Freschet and al., 2021 |
| Root C content                               | Belowground | Food provision                                    | Freschet and al., 2021 |
| Root C:N                                     | Belowground | Supply of nutrients for agroecosystem functioning | Freschet and al., 2021 |
| Root C:N ratio                               | Belowground | Supply of nutrients for agroecosystem functioning | Freschet and al., 2021 |
| Root C:N ratio                               | Belowground | Regulation of water balance for crop development  | Freschet and al., 2021 |
| Root distribution (horizontal and verticale) | Belowground | Supply of nutrients for agroecosystem functioning | Freschet and al., 2021 |
| Root distribution (horizontal and verticale) | Belowground | Regulation of water balance for crop development  | Freschet and al., 2021 |
| Root growth                                  | Belowground | Weed control                                      | Freschet and al., 2021 |
| Root hair density                            | Belowground | Regulation of water balance for crop development  | Freschet and al., 2021 |
| Root hair density                            | Belowground | Supply of nutrients for agroecosystem functioning | Freschet and al., 2021 |
| Root hair density                            | Belowground | Maintenance of associated biodiversity            | Freschet and al., 2021 |
| Root length/depth (maximum)                  | Belowground | Supply of nutrients for agroecosystem functioning | Freschet and al., 2021 |
| Root length/depth (maximum)                  | Belowground | Erosion control                                   | Freschet and al., 2021 |
| Root length/depth (maximum)                  | Belowground | Weed control                                      | Freschet and al., 2021 |
| Root length/depth (maximum)                  | Belowground | Regulation of greenhouse gases                    | Freschet and al., 2021 |
| Root length/depth (maximum)                  | Belowground | Regulation of water balance for crop development  | Freschet and al., 2021 |
| Root mass                                    | Belowground | Erosion control                                   | Freschet and al., 2021 |
| Root mass                                    | Belowground | Regulation of greenhouse gases                    | Freschet and al., 2021 |
| Root mass                                    | Belowground | Supply of nutrients for agroecosystem functioning | Freschet and al., 2021 |
| Root N content                               | Belowground | Supply of nutrients for agroecosystem functioning | Freschet and al., 2021 |
| Root N content                               | Belowground | Food provision                                    | Freschet and al., 2021 |
| Root P content                               | Belowground | Supply of nutrients for agroecosystem functioning | Freschet and al., 2021 |
| Root P content                               | Belowground | Supply of nutrients for agroecosystem functioning | Freschet and al., 2021 |
| Root thickness                               | Belowground | Pest control                                      | Freschet and al., 2021 |
| Root thickness                               | Belowground | Regulation of water balance for crop development  | Freschet and al., 2021 |
| Root thickness                               | Belowground | Supply of nutrients for agroecosystem functioning | Freschet and al., 2021 |
| Root toughness                               | Belowground | Pest control                                      | Freschet and al., 2021 |
| Rooting system lifespan                      | Belowground | Supply of nutrients for agroecosystem functioning | Freschet and al., 2021 |
| Shoot mass                                   | Belowground | Erosion control                                   | Freschet and al., 2021 |
| Specific root respiration                    | Belowground | Regulation of greenhouse gases                    | Freschet and al., 2021 |
| Type of mycorrhizal symbiosis                | Belowground | Regulation of greenhouse gases                    | Freschet and al., 2021 |

**Table A1.2:** Total detail of crop choice by participants during the workshop

| Crop name        | Latin name                          | Family         | Functional groups | Duration  | P1 | P2 | P3 | P4 | P5 | Total crop choice occurrence |
|------------------|-------------------------------------|----------------|-------------------|-----------|----|----|----|----|----|------------------------------|
| Alfalfa          | Medicago sativa                     | Fabaceae       | Legumes           | perennial | 0  | 1  | 0  | 1  | 0  | 2                            |
| Bean             | Phaseolus vulgaris                  | Fabaceae       | Legumes           | annual    | 0  | 0  | 0  | 0  | 0  | 0                            |
| Bristle oat      | Avena sativa                        | Poaceae        | Ley species       | annual    | 0  | 0  | 0  | 1  | 0  | 1                            |
| Bromegrass       | Bromus spp.                         | Poaceae        | Ley species       | perennial | 0  | 0  | 0  | 0  | 0  | 0                            |
| Buckwheat        | Fagopyrum esculentum                | Polygonaceae   | Broadleave        | annual    | 1  | 1  | 1  | 1  | 0  | 4                            |
| Camelina         | Camelina sativa                     | Brassicaceae   | Broadleave        | annual    | 0  | 0  | 0  | 0  | 0  | 0                            |
| Carrot           | Daucus carota                       | Apiaceae       | Broadleave        | annual    | 0  | 0  | 1  | 0  | 0  | 1                            |
| Chickpea         | Cicer arietinum                     | Fabaceae       | Legumes           | annual    | 0  | 0  | 0  | 0  | 0  | 0                            |
| Chinese radish*  | Raphanus sativus var. longipinnatus | Brassicaceae   | Broadleave        | annual    | 0  | 0  | 1  | 0  | 0  | 1                            |
| Cock's foot      | Dactylis spp.                       | Poaceae        | Ley species       | perennial | 0  | 0  | 0  | 1  | 0  | 1                            |
| Corn             | Zea mays                            | Poaceae        | Cereal            | annual    | 0  | 0  | 0  | 1  | 0  | 1                            |
| Crimson clover   | Trifolium incarnatum                | Fabaceae       | Legumes           | annual    | 0  | 0  | 0  | 1  | 0  | 1                            |
| Egyptian clover* | Trifolium alexandrinum              | Fabaceae       | Legumes           | annual    | 0  | 1  | 0  | 0  | 0  | 1                            |
| English ryegrass | Lolium perenne                      | Poaceae        | Ley species       | perennial | 0  | 0  | 0  | 1  | 0  | 1                            |
| Faba bean        | Vicia faba                          | Fabaceae       | Legumes           | annual    | 0  | 0  | 0  | 0  | 0  | 0                            |
| Fenugreek        | Trigonella foenum-graecum           | Fabaceae       | Legumes           | annual    | 0  | 0  | 0  | 0  | 0  | 0                            |
| Fescues          | Festuca spp.                        | Poaceae        | Ley species       | perennial | 0  | 0  | 0  | 0  | 0  | 0                            |
| Fodder beet      | Beta vulgaris                       | Chenopodiaceae | Broadleave        | annual    | 1  | 0  | 0  | 0  | 0  | 1                            |
| Fodder radish    | Raphanus sativus                    | Brassicaceae   | Broadleave        | annual    | 0  | 0  | 0  | 1  | 0  | 1                            |
| Hemp             | Cannabis sativa                     | Cannabaceae    | Broadleave        | annual    | 1  | 0  | 0  | 0  | 0  | 1                            |
| Italian ryegrass | Lolium multiflorum                  | Poaceae        | Ley species       | perennial | 0  | 0  | 0  | 0  | 0  | 0                            |
| Leek             | Allium porum                        | Aliaceae       | Broadleave        | annual    | 0  | 0  | 0  | 1  | 0  | 1                            |
| Lentil           | Lens culinaris                      | Fabaceae       | Legumes           | annual    | 1  | 1  | 0  | 0  | 1  | 3                            |
| Millet           | Panicum miliaceum                   | Poaceae        | Cereal            | annual    | 0  | 0  | 0  | 0  | 0  | 0                            |
| Miscanthus       | Miscanthus spp.                     | Poaceae        | Ley species       | perennial | 0  | 0  | 0  | 0  | 0  | 0                            |
| Onion            | Allium cepa                         | Aliaceae       | Broadleave        | annual    | 0  | 0  | 1  | 0  | 1  | 2                            |
| Orchardgrass     | Dactylis glomerata                  | Poaceae        | Ley species       | perennial | 0  | 0  | 0  | 0  | 0  | 0                            |
| Phacelia         | Phacelia tanacetifolia              | Boraginaceae   | Broadleave        | annual    | 0  | 1  | 1  | 0  | 1  | 3                            |
| Potato           | Solanum tuberosum                   | Solanaceae     | Broadleave        | annual    | 1  | 0  | 1  | 0  | 1  | 3                            |
| Quinoa           | Chenopodium quinoa                  | Chenopodiaceae | Broadleave        | annual    | 0  | 0  | 0  | 1  | 0  | 1                            |

|                  |                       |                |             |           |   |   |   |   |   |   |
|------------------|-----------------------|----------------|-------------|-----------|---|---|---|---|---|---|
| Rapeseed         | Brassica napus        | Brassicaceae   | Broadleave  | annual    | 1 | 1 | 1 | 0 | 0 | 3 |
| Red clover       | Trifolium pratense    | Fabaceae       | Legumes     | perennial | 0 | 0 | 0 | 1 | 0 | 1 |
| Rye              | Secale cereale        | Poaceae        | Cereal      | annual    | 0 | 0 | 0 | 0 | 0 | 0 |
| Sainfoin         | Onobrychis viciifolia | Fabaceae       | Ley species | annual    | 0 | 0 | 0 | 0 | 1 | 1 |
| Sorghum          | Sorghum bicolor       | Poaceae        | Cereal      | annual    | 1 | 0 | 0 | 0 | 0 | 1 |
| Soybean          | Glycine max           | Fabaceae       | Legumes     | annual    | 0 | 0 | 0 | 0 | 0 | 0 |
| Spelt            | Triticum spelta       | Poaceae        | Cereal      | annual    | 0 | 0 | 1 | 0 | 1 | 2 |
| Spring barley    | Hordeum vulgare       | Poaceae        | Cereal      | annual    | 0 | 0 | 0 | 1 | 0 | 1 |
| Spring faba bean | Vicia faba            | Fabaceae       | Legumes     | annual    | 0 | 1 | 1 | 1 | 0 | 3 |
| Spring field pea | Pisum sativum         | Fabaceae       | Legumes     | annual    | 0 | 0 | 0 | 1 | 0 | 1 |
| Spring flax      | Linum usitatissimum   | Lineaceae      | Broadleave  | annual    | 0 | 0 | 0 | 0 | 0 | 0 |
| Spring lupin     | Lupinus spp.          | Fabaceae       | Legumes     | annual    | 0 | 0 | 0 | 0 | 0 | 0 |
| Spring oat       | Avena sativa          | Poaceae        | Cereal      | annual    | 0 | 1 | 0 | 1 | 0 | 2 |
| Spring spinach   | Spinacia oleracea     | Chenopodiaceae | Broadleave  | annual    | 0 | 0 | 0 | 0 | 0 | 0 |
| Spring wheat     | Triticum aestivum     | Poaceae        | Cereal      | annual    | 0 | 0 | 0 | 0 | 1 | 1 |
| Sunflower        | Helianthus annuus     | Asteraceae     | Broadleave  | annual    | 0 | 1 | 0 | 0 | 0 | 1 |
| Timothy grass    | Phleum pratense       | Poaceae        | Ley species | perennial | 0 | 0 | 0 | 1 | 0 | 1 |
| Trefoil          | Lotus corniculatus L. | Fabaceae       | Legumes     | perennial | 0 | 0 | 0 | 1 | 0 | 1 |
| Triticale        | × Triticosecale       | Poaceae        | Cereal      | annual    | 0 | 0 | 0 | 1 | 0 | 1 |
| Turnip rape      | Brassica rapa         | Brassicaceae   | Broadleave  | annual    | 0 | 0 | 0 | 0 | 0 | 0 |
| Vetch            | Vicia spp.            | Fabaceae       | Legumes     | annual    | 0 | 0 | 0 | 1 | 0 | 1 |
| Vetchling        | Lathyrus spp.         | Fabaceae       | Ley species | annual    | 0 | 0 | 0 | 0 | 0 | 0 |
| White clover     | Trifolium repens      | Fabaceae       | Legumes     | perennial | 0 | 1 | 1 | 1 | 0 | 3 |
| White mustard    | Sinapis alba          | Brassicaceae   | Broadleave  | annual    | 0 | 0 | 1 | 1 | 1 | 3 |
| Winter barley    | Hordeum vulgare       | Poaceae        | Cereal      | annual    | 0 | 0 | 0 | 0 | 0 | 0 |
| Winter faba bean | Vicia faba            | Fabaceae       | Legumes     | annual    | 0 | 0 | 0 | 1 | 0 | 1 |
| Winter field pea | Pisum sativum         | Fabaceae       | Legumes     | annual    | 1 | 0 | 0 | 0 | 0 | 1 |
| Winter flax      | Linum usitatissimum   | Lineaceae      | Broadleave  | annual    | 0 | 0 | 0 | 0 | 0 | 0 |
| Winter lupin     | Lupinus spp.          | Fabaceae       | Legumes     | annual    | 0 | 0 | 0 | 0 | 0 | 0 |
| Winter oat       | Avena sativa          | Poaceae        | Cereal      | annual    | 0 | 0 | 0 | 0 | 0 | 0 |
| Winter spinach   | Spinacia oleracea     | Chenopodiaceae | Broadleave  | annual    | 0 | 0 | 0 | 0 | 0 | 0 |
| Winter wheat     | Triticum aestivum     | Poaceae        | Cereal      | annual    | 1 | 1 | 1 | 1 | 0 | 4 |

**Table A1.3:** Details of the characteristics given by participants as rationale for their crop choice during workshop.

| <b>Crop species</b> | <b>Raw characteristics given by participants during the crop choice</b> | <b>Knowledge origin</b> | <b>Ecosystem service targeted</b>                 |
|---------------------|-------------------------------------------------------------------------|-------------------------|---------------------------------------------------|
| Spring oats         | Food                                                                    | T                       | Food provision                                    |
| Spring oats         | Food                                                                    | T                       | Food provision                                    |
| Spring oats         | Good association with lentils*                                          | T                       | Supply of nutrients for agroecosystem functioning |
| Spring oats         | Good association with lentils*                                          | T                       | Supply of nutrients for agroecosystem functioning |
| Spring oats         | Good association with lentils*                                          | T                       | Supply of nutrients for agroecosystem functioning |
| Winter oats         | Food supply                                                             | T                       | Food provision                                    |
| Fodder beet         | Forage potential                                                        | T                       | Food provision                                    |
| Fodder beet         | Forage potential                                                        | T                       | Food provision                                    |
| Spring wheat        | Food                                                                    | T                       | Food provision                                    |
| Winter wheat        | Food                                                                    | T                       | Food provision                                    |
| Winter wheat        | Food                                                                    | T                       | Food provision                                    |
| Winter wheat        | Food                                                                    | T                       | Food provision                                    |
| Winter wheat        | Food                                                                    | T                       | Food provision                                    |
| Winter wheat        | Good association with faba bean*                                        | E                       | Supply of nutrients for agroecosystem functioning |
| Winter wheat        | Good association with faba bean*                                        | E                       | Pest control                                      |
| Winter wheat        | Good association with faba bean*                                        | E                       | Weed control                                      |
| Carrot              | Food supply                                                             | T                       | Food provision                                    |
| Carrot              | Organoleptic quality - vitamins                                         | Sp                      | Food provision                                    |
| Hemp                | Limitation of GHG emissions                                             | E                       | Regulation of greenhouse gases                    |
| Hemp                | Pollination                                                             | Sp                      | Maintenance of associated biodiversity            |
| Hemp                | Food                                                                    | T                       | Food provision                                    |
| Rapeseed            | Weed control                                                            | T                       | Weed control                                      |
| Rapeseed            | Soil fertility maintenance                                              | T                       | Supply of nutrients for agroecosystem functioning |
| Rapeseed            | Soil fertility maintenance                                              | T                       | Supply of nutrients for agroecosystem functioning |
| Rapeseed            | Soil structuring                                                        | E                       | Supply of nutrients for agroecosystem functioning |
| Rapeseed            | Soil structuring                                                        | E                       | Regulation of water balance for crop development  |
| Rapeseed            | Soil structuring                                                        | E                       | Erosion control                                   |
| Rapeseed            | Food                                                                    | T                       | Food provision                                    |
| Rapeseed            | Food                                                                    | T                       | Food provision                                    |
| Rapeseed            | Low sensitivity to bioaggressors                                        | Sp                      | Regulation of greenhouse gases                    |

|                     |                                   |    |                                                   |
|---------------------|-----------------------------------|----|---------------------------------------------------|
| Rapeseed            | Forage potential                  | E  | Food provision                                    |
| Cocksfoot           | Drought resistance                | E  | Regulation of water balance for crop development  |
| Cocksfoot           | Forage supply                     | T  | Food provision                                    |
| Spelt               | Disease resistance                | T  | Pest control                                      |
| Spelt               | Disease resistance                | T  | Pest control                                      |
| Spelt               | Drought resistance                | E  | Regulation of water balance for crop development  |
| Spelt               | Food                              | T  | Supply of nutrients for agroecosystem functioning |
| Spelt               | Food                              | T  | Supply of nutrients for agroecosystem functioning |
| Spinach             | Food supply                       | T  | Food provision                                    |
| Spinach             | Valorization of nitrogen residues | Sp | Supply of nutrients for agroecosystem functioning |
| Fescue              | Deep root system                  | T  | Regulation of water balance for crop development  |
| Fescue              | Deep root system                  | T  | Supply of nutrients for agroecosystem functioning |
| Fescue              | Forage supply                     | T  | Food provision                                    |
| Winter faba bean    | Forage potential                  | T  | Food provision                                    |
| Winter faba bean    | Nitrogen supply to the soil       | T  | Supply of nutrients for agroecosystem functioning |
| Spring faba bean    | Forage potential                  | E  | Food provision                                    |
| Spring faba bean    | Forage potential                  | E  | Food provision                                    |
| Spring faba bean    | Nitrogen supply to the soil       | T  | Supply of nutrients for agroecosystem functioning |
| Spring faba bean    | Nitrogen supply to the soil       | T  | Supply of nutrients for agroecosystem functioning |
| Timothy             | Forage supply                     | T  | Food provision                                    |
| Lentil              | Food                              | T  | Food provision                                    |
| Lentil              | Food                              | T  | Food provision                                    |
| Lentil              | Forage potential                  | E  | Food provision                                    |
| Lentil              | Nitrogen supply to the soil       | T  | Supply of nutrients for agroecosystem functioning |
| Lentil              | Nitrogen supply to the soil       | T  | Supply of nutrients for agroecosystem functioning |
| Lentil              | Nitrogen supply to the soil       | T  | Supply of nutrients for agroecosystem functioning |
| Bird's-foot trefoil | Nitrogen supply                   | T  | Supply of nutrients for agroecosystem functioning |
| Alfalfa             | Soil structuring                  | E  | Erosion control                                   |
| Alfalfa             | Soil structuring                  | E  | Supply of nutrients for agroecosystem functioning |
| Alfalfa             | Soil structuring                  | E  | Regulation of water balance for crop development  |
| Alfalfa             | Deep nutrient capture             | E  | Supply of nutrients for agroecosystem functioning |
| Alfalfa             | Deep water capture                | T  | Regulation of water balance for crop development  |
| Alfalfa             | Weed control                      | Sp | Weed control                                      |
| Alfalfa             | Forage potential                  | E  | Food provision                                    |
| Alfalfa             | Forage potential                  | E  | Food provision                                    |
| Maize               | Food                              | T  | Food provision                                    |
| White mustard       | Pollination                       | T  | Maintenance of associated biodiversity            |

|               |                             |    |                                                   |
|---------------|-----------------------------|----|---------------------------------------------------|
| White mustard | Frost sensitive             | E  | Weed control                                      |
| White mustard | Pest control                | T  | Pest control                                      |
| White mustard | Pest control                | E  | Pest control                                      |
| White mustard | Pest control                | E  | Pest control                                      |
| White mustard | Soil structuring            | T  | Supply of nutrients for agroecosystem functioning |
| White mustard | Soil structuring            | T  | Erosion control                                   |
| White mustard | Soil structuring            | T  | Regulation of water balance for crop development  |
| White mustard | Weed control                | T  | Weed control                                      |
| White mustard | Weed control                | T  | Weed control                                      |
| White mustard | Soil fertility maintenance  | T  | Supply of nutrients for agroecosystem functioning |
| White mustard | Biomass                     | T  | Supply of nutrients for agroecosystem functioning |
| Onion         | Pollination                 | T  | Maintenance of associated biodiversity            |
| Onion         | Organoleptic quality        | E  | Food provision                                    |
| Onion         | Pest control                | Sp | Pest control                                      |
| Onion         | Easy to clean               | E  | Regulation of greenhouse gases                    |
| Spring barley | Biomass                     | T  | Supply of nutrients for agroecosystem functioning |
| Phacelia      | Beauty                      | E  | Cultural                                          |
| Phacelia      | Soil structuring            | T  | Supply of nutrients for agroecosystem functioning |
| Phacelia      | Soil structuring            | T  | Erosion control                                   |
| Phacelia      | Soil structuring            | T  | Regulation of water balance for crop development  |
| Phacelia      | Ground cover                | T  | Supply of nutrients for agroecosystem functioning |
| Phacelia      | Pest control                | T  | Pest control                                      |
| Phacelia      | Pollination                 | T  | Maintenance of associated biodiversity            |
| Phacelia      | Pollination                 | T  | Maintenance of associated biodiversity            |
| Phacelia      | Pollination                 | T  | Maintenance of associated biodiversity            |
| Phacelia      | Biomass                     | T  | Supply of nutrients for agroecosystem functioning |
| Phacelia      | Biomass                     | T  | Supply of nutrients for agroecosystem functioning |
| Leek          | Food supply                 | T  | Food provision                                    |
| Leek          | Allelopathy                 | Sp | Weed control                                      |
| Leek          | Allelopathy                 | Sp | Pest control                                      |
| Pea           | Food                        | E  | Food provision                                    |
| Pea           | Nitrogen supply to the soil | T  | Supply of nutrients for agroecosystem functioning |
| Pea           | Nitrogen supply to the soil | T  | Supply of nutrients for agroecosystem functioning |
| Pea           | Forage potential            | T  | Food provision                                    |
| Potato        | Gastronomy/Heritage         | E  | Cultural                                          |
| Potato        | Pest control                | Sp | Pest control                                      |
| Potato        | Organic matter return       | Sp | Supply of nutrients for agroecosystem functioning |



|                  |                             |    |                                                   |
|------------------|-----------------------------|----|---------------------------------------------------|
| Potato           | Energy source               | T  | Food provision                                    |
| Potato           | Energy source               | T  | Food provision                                    |
| Potato           | Energy source               | T  | Food provision                                    |
| Potato           | Energy source               | T  | Food provision                                    |
| Quinoa           | Soil restitution            | Sp | Supply of nutrients for agroecosystem functioning |
| Quinoa           | Weed control                | Sp | Weed control                                      |
| Chinese radish   | Aeration                    | E  | Supply of nutrients for agroecosystem functioning |
| Chinese radish   | Aeration                    | E  | Regulation of water balance for crop development  |
| Chinese radish   | Aeration                    | E  | Erosion control                                   |
| Chinese radish   | Minimal soil work           | E  | Regulation of greenhouse gases                    |
| Chinese radish   | Minimal soil work           | E  | Erosion control                                   |
| Chinese radish   | Strong rooting              | T  | Regulation of water balance for crop development  |
| Forage radish    | Ground cover                | E  | Erosion control                                   |
| Forage radish    | Ground cover                | E  | Pest control                                      |
| Forage radish    | Ground cover                | E  | Maintenance of water quality                      |
| Forage radish    | Soil restitution            | E  | Supply of nutrients for agroecosystem functioning |
| Forage radish    | Allelopathy                 | E  | Weed control                                      |
| English ryegrass | Ground cover                | T  | Supply of nutrients for agroecosystem functioning |
| English ryegrass | Ground cover                | T  | Pest control                                      |
| English ryegrass | Ground cover                | T  | Maintenance of water quality                      |
| English ryegrass | Ground cover                | T  | Erosion control                                   |
| English ryegrass | Root biomass                | T  | Supply of nutrients for agroecosystem functioning |
| Sainfoin         | Pollination                 | T  | Maintenance of associated biodiversity            |
| Sainfoin         | Drought-adapted             | E  | Regulation of water balance for crop development  |
| Sainfoin         | Forage potential            | Sp | Food provision                                    |
| Sainfoin         | Weed control                | Sp | Weed control                                      |
| Sainfoin         | Nitrogen supply to the soil | T  | Supply of nutrients for agroecosystem functioning |
| Buckwheat        | Food                        | T  | Food provision                                    |
| Buckwheat        | Weed control                | T  | Weed control                                      |
| Buckwheat        | Weed control                | T  | Weed control                                      |
| Buckwheat        | Weed control                | T  | Weed control                                      |
| Buckwheat        | Gastronomy/Heritage         | E  | Cultural                                          |
| Buckwheat        | Low input consumption       | E  | Maintenance of water quality                      |
| Buckwheat        | Low input consumption       | E  | Regulation of greenhouse gases                    |
| Buckwheat        | Low soil work requirement   | Sp | Regulation of greenhouse gases                    |
| Rye              | Deep root system            | T  | Supply of nutrients for agroecosystem functioning |
| Rye              | Deep root system            | T  | Regulation of water balance for crop development  |

|                 |                             |   |                                                   |
|-----------------|-----------------------------|---|---------------------------------------------------|
| Rye             | Ground cover                | T | Supply of nutrients for agroecosystem functioning |
| Rye             | Ground cover                | T | Weed control                                      |
| Rye             | Ground cover                | T | Maintenance of water quality                      |
| Rye             | Ground cover                | T | Erosion control                                   |
| Forage sorghum  | Leaching attenuation        | E | Supply of nutrients for agroecosystem functioning |
| Forage sorghum  | Leaching attenuation        | E | Maintenance of water quality                      |
| Forage sorghum  | Forage potential            | E | Food provision                                    |
| Sunflower       | Pollination                 | T | Maintenance of associated biodiversity            |
| Sunflower       | Pollination                 | T | Maintenance of associated biodiversity            |
| Sunflower       | Food                        | T | Food provision                                    |
| Sunflower       | Food                        | T | Food provision                                    |
| White clover    | Perennial - cover           | T | Supply of nutrients for agroecosystem functioning |
| White clover    | Perennial - cover           | T | Maintenance of water quality                      |
| White clover    | Perennial - cover           | T | Weed control                                      |
| White clover    | Perennial - cover           | T | Erosion control                                   |
| White clover    | Perennial - cover           | T | Supply of nutrients for agroecosystem functioning |
| White clover    | Perennial - cover           | T | Maintenance of water quality                      |
| White clover    | Perennial - cover           | T | Weed control                                      |
| White clover    | Perennial - cover           | T | Erosion control                                   |
| White clover    | Surface roots               | T | Supply of nutrients for agroecosystem functioning |
| White clover    | Association with rapeseed   | E | Supply of nutrients for agroecosystem functioning |
| Egyptian clover | Forage potential            | E | Food provision                                    |
| Egyptian clover | Nitrogen supply to the soil | T | Supply of nutrients for agroecosystem functioning |
| Crimson clover  | Nitrogen supply to the soil | T | Supply of nutrients for agroecosystem functioning |
| Crimson clover  | Forage potential            | E | Food provision                                    |
| Red clover      | Nitrogen supply to the soil | T | Supply of nutrients for agroecosystem functioning |
| Red clover      | Nitrogen supply to the soil | T | Supply of nutrients for agroecosystem functioning |
| Red clover      | Forage potential            | E | Food provision                                    |
| Triticale       | Forage potential            | E | Food provision                                    |
| Triticale       | Biomass                     | T | Supply of nutrients for agroecosystem functioning |
| Vetch           | Forage potential            | E | Food provision                                    |
| Vetch           | Nitrogen supply to the soil | T | Supply of nutrients for agroecosystem functioning |
