# Supplementary material for: Fostering creativity to design biodiversity-based cropping systems that consider the long term: a participatory framework
Source: Frontiers journal article supplement (doi:10.3389/fagro.2025.1601337), 2025-08-08
Supplement: Data_Sheet_2.pdf [file Data_Sheet_2.pdf]

## Appendix 2

Supplemental information for: **Fostering creativity to design biodiversity-based cropping systems that consider the long term: a participation framework**

Complete 30-items questionnaire, given to each participant for immediate workshop evaluation.

# Questionnaire Participant TomorRot1

## Evaluation questionnaire for the "TomorROT 1: designing tomorrow's rotations" workshop

### Section 1 of 4

#### Before your participation to the workshop...

1. Why did you take part in this workshop?

- ☐ I wanted to use the workshop outputs in my activities
- ☐ I wanted to learn more about crop diversification
- ☐ I wanted to attend out of curiosity (about the topic, the workshop format).
- ☐ I wanted to organize workshops like this as part of my professional activities.
- ☐ I wanted to talk to professionals
- ☐ Other...

2. Have you ever taken part in co-design workshops?

- ☐ Yes, as organizer
- ☐ Yes, as participant
- ☐ Never

3. Please indicate whether you are familiar with the following terms.

*For the purposes of this exercise, familiarity implies having heard of the term and being able to provide a valid definition*

- ☐ Ecosystem services
- ☐ Crop diversification
- ☐ Co-design

### During your participation to the workshop...

4. On a scale of 1 to 5, do you think the workshop really enabled collective reflection?

*(1 the workshop didn't enable collective reflection at all - 5 the workshop fully enabled collective reflection)*

☐ ☐ ☐ ☐ ☐

**1** **5**

5. On a scale of 1 to 5, did you agree with the decisions taken collectively?

*(1 I strongly disagree with the decisions taken - 5 I completely agree with the decisions taken)*

☐ ☐ ☐ ☐ ☐

**1** **5**

6. On a scale of 1 to 5, do you feel you participated in the construction of collective decisions?

*(1, no, I don't feel I played a part in shaping collective decisions - 5, yes, I feel I played an active part in shaping decisions)*

☐ ☐ ☐ ☐ ☐

**1** **5**

7. How would you describe the group atmosphere?

- ☐ Cold
- ☐ Energetic
- ☐ Conflicting
- ☐ Pleasant/Friendly
- ☐ Timorous/Shy
- ☐ Cooperative
- ☐ Individualist
- ☐ Studious
- ☐ Distracted
- ☐ Kind

8. On a scale of 1 to 5, did you feel that the group atmosphere encouraged new ideas?

(1 the group atmosphere was an obstacle to the development of new ideas - 5 the group atmosphere was a real catalyst for the development of new ideas)

○ ○ ○ ○ ○  
1 5

9. On a scale of 1 to 5, were the intermediate playful objects (cards, pirate theme...) used useful and appropriate for achieving the workshop objectives?

(1. objects were not adapted - 5. objects were very useful and completely adapted)

○ ○ ○ ○ ○  
1 5

Could you explain why?

---

10. Did you miss any data (climatic, agronomical, etc.)?

---

11. On a scale of 1 to 5, did you feel any lack of knowledge?

(1 I felt a lack of knowledge that made it difficult for me to participate - 5 the level of knowledge required was adapted to my own)

○ ○ ○ ○ ○  
1 5

*If so, in which area(s)?*

---

12. Did your exchanges with participants provide you with additional knowledge?

- ☐ No, exchanges with other participants didn't give me any new knowledge.
- ☐ Yes, the exchanges give me new elements

13. How do you feel you participated in the workshop?

- ☐ I've been a force to be reckoned with
- ☐ I brought listening and dialogue between participants
- ☐ I have completed and adapted the proposals
- ☐ I brought dynamism to the workshop
- ☐ In my opinion, I didn't bring anything to this workshop.
- ☐ Other...

## Outputs of the workshop...

14. On a scale of 1 to 5, do you think the rotations designed collectively met the objectives set at the start of the workshop?

*(1 no, they didn't meet the objectives at all - 5 yes, in my opinion, they met all the objectives set)*

☐ ☐ ☐ ☐ ☐

**1** **5**

15. Please indicate on a scale of 1 to 5 whether you believe all the rotations you have co-designed are feasible.

*(1 they are unfeasible - 5 they are realistic in the context introduced)*

☐ ☐ ☐ ☐ ☐

**1** **5**

16. What limits do you identify? (You can give specifics for each rotation)

---

---

17. On a scale of 1 to 5, how innovative were the crop rotation you co-designed?

*(1 they are not innovative as all - 5 they are very innovative compare to existent one's)*

☐ ☐ ☐ ☐ ☐

**1** **5**

18. Do the co-designed rotations prompt you to consider new approaches that you can integrate into your work?

- ☐ Yes
- ☐ Not really
- ☐ No

*Could you elaborate on your arguments?*

---

---

19. Please describe the personal insights and lessons you gained from this experience.

---

---

#### Section 4 of 4

### Global evaluation of workshop

The objective of this section is to provide a critical analysis of the workshop's overall organization, with the aim of identifying potential areas for improvement.

20. On a scale of 1 to 5, was the workshop easy to understand?  
(1 Not at all understandable - 5 Quite clear)

☐ ☐ ☐ ☐ ☐

**1** **5**

21. On a scale of 1 to 5, how would you rate the clarity and relevance of the introductory section?  
(1 not clear at all - 5 very clear)

☐ ☐ ☐ ☐ ☐

**1** **5**

*Do you have any comments on the introductory section (improvements, criticisms, opinions, etc.)?*

---

---

22. On a scale of 1 to 5, was narrative setting necessary to meet workshop objectives?

*(1 useless - 5 indispensable)*

☐ ☐ ☐ ☐ ☐  
**1** **5**

23. Was the narrative important in your decision-making?

*(1 not at all - 5 yes it exerted a considerable influence)*

☐ ☐ ☐ ☐ ☐  
**1** **5**

*Do you have any comments on the narrative (format improvements, criticism, opinions, etc.)?*

---

---

24. Would you have liked the situation to have been introduced differently from a power point?

---

---

25. On a scale of 1 to 5, did the presenter facilitate exchanges?

*(1 not at all - 5 yes a lot)*

☐ ☐ ☐ ☐ ☐  
**1** **5**

26. Do you think the facilitation techniques may have had an influence on the outcome of the workshop?

- ☐ Yes  
☐ No

*Could you elaborate?*

---

---

27. On a scale of 1 to 5, how did you find the organization and running of the workshop?

*(1 very unclear - 5 very clear)*

☐ ☐ ☐ ☐ ☐  
**1** **5**

28. Will you be taking part in the second workshop session?

- ☐ Yes  
☐ No

29. Would you like to be contacted again to discuss this half-day event in more detail?

- ☐ Yes  
☐ No

30. General comments

---

---
