# Supplementary material for: Fostering creativity to design biodiversity-based cropping systems that consider the long term: a participatory framework
Source: Frontiers journal article supplement (doi:10.3389/fagro.2025.1601337), 2025-08-08
Supplement: Data_Sheet_3.pdf [file Data_Sheet_3.pdf]

### Appendix 3

Supplemental information for: **Fostering creativity to design biodiversity-based cropping systems that consider the long term: a participation framework**

**Table A3:** Details of the characteristics given by participants as rationale for their crop choice during workshop.

| Crop species | Raw characteristics given by participants during the crop choice | Knowledge origin | Ecosystem service targeted                        |
|--------------|------------------------------------------------------------------|------------------|---------------------------------------------------|
| Spring oats  | Food                                                             | T                | Food provision                                    |
| Spring oats  | Food                                                             | T                | Food provision                                    |
| Spring oats  | Good association with lentils*                                   | T                | Supply of nutrients for agroecosystem functioning |
| Spring oats  | Good association with lentils*                                   | T                | Supply of nutrients for agroecosystem functioning |
| Spring oats  | Good association with lentils*                                   | T                | Supply of nutrients for agroecosystem functioning |
| Winter oats  | Food supply                                                      | T                | Food provision                                    |
| Fodder beet  | Forage potential                                                 | T                | Food provision                                    |
| Fodder beet  | Forage potential                                                 | T                | Food provision                                    |
| Spring wheat | Food                                                             | T                | Food provision                                    |
| Winter wheat | Food                                                             | T                | Food provision                                    |
| Winter wheat | Food                                                             | T                | Food provision                                    |
| Winter wheat | Food                                                             | T                | Food provision                                    |
| Winter wheat | Food                                                             | T                | Food provision                                    |
| Winter wheat | Good association with faba bean*                                 | E                | Supply of nutrients for agroecosystem functioning |
| Winter wheat | Good association with faba bean*                                 | E                | Pest control                                      |
| Winter wheat | Good association with faba bean*                                 | E                | Weed control                                      |
| Carrot       | Food supply                                                      | T                | Food provision                                    |
| Carrot       | Organoleptic quality - vitamins                                  | Sp               | Food provision                                    |
| Hemp         | Limitation of GHG emissions                                      | E                | Regulation of greenhouse gases                    |
| Hemp         | Pollination                                                      | Sp               | Maintenance of associated biodiversity            |
| Hemp         | Food                                                             | T                | Food provision                                    |
| Rapeseed     | Weed control                                                     | T                | Weed control                                      |
| Rapeseed     | Soil fertility maintenance                                       | T                | Supply of nutrients for agroecosystem functioning |
| Rapeseed     | Soil fertility maintenance                                       | T                | Supply of nutrients for agroecosystem functioning |
| Rapeseed     | Soil structuring                                                 | E                | Supply of nutrients for agroecosystem functioning |
| Rapeseed     | Soil structuring                                                 | E                | Regulation of water balance for crop development  |
| Rapeseed     | Soil structuring                                                 | E                | Erosion control                                   |

|                     |                                   |    |                                                   |
|---------------------|-----------------------------------|----|---------------------------------------------------|
| Rapeseed            | Food                              | T  | Food provision                                    |
| Rapeseed            | Food                              | T  | Food provision                                    |
| Rapeseed            | Low sensitivity to bioaggressors  | Sp | Regulation of greenhouse gases                    |
| Rapeseed            | Forage potential                  | E  | Food provision                                    |
| Cocksfoot           | Drought resistance                | E  | Regulation of water balance for crop development  |
| Cocksfoot           | Forage supply                     | T  | Food provision                                    |
| Spelt               | Disease resistance                | T  | Pest control                                      |
| Spelt               | Disease resistance                | T  | Pest control                                      |
| Spelt               | Drought resistance                | E  | Regulation of water balance for crop development  |
| Spelt               | Food                              | T  | Supply of nutrients for agroecosystem functioning |
| Spelt               | Food                              | T  | Supply of nutrients for agroecosystem functioning |
| Spinach             | Food supply                       | T  | Food provision                                    |
| Spinach             | Valorization of nitrogen residues | Sp | Supply of nutrients for agroecosystem functioning |
| Fescue              | Deep root system                  | T  | Regulation of water balance for crop development  |
| Fescue              | Deep root system                  | T  | Supply of nutrients for agroecosystem functioning |
| Fescue              | Forage supply                     | T  | Food provision                                    |
| Winter faba bean    | Forage potential                  | T  | Food provision                                    |
| Winter faba bean    | Nitrogen supply to the soil       | T  | Supply of nutrients for agroecosystem functioning |
| Spring faba bean    | Forage potential                  | E  | Food provision                                    |
| Spring faba bean    | Forage potential                  | E  | Food provision                                    |
| Spring faba bean    | Nitrogen supply to the soil       | T  | Supply of nutrients for agroecosystem functioning |
| Spring faba bean    | Nitrogen supply to the soil       | T  | Supply of nutrients for agroecosystem functioning |
| Timothy             | Forage supply                     | T  | Food provision                                    |
| Lentil              | Food                              | T  | Food provision                                    |
| Lentil              | Food                              | T  | Food provision                                    |
| Lentil              | Forage potential                  | E  | Food provision                                    |
| Lentil              | Nitrogen supply to the soil       | T  | Supply of nutrients for agroecosystem functioning |
| Lentil              | Nitrogen supply to the soil       | T  | Supply of nutrients for agroecosystem functioning |
| Lentil              | Nitrogen supply to the soil       | T  | Supply of nutrients for agroecosystem functioning |
| Bird's-foot trefoil | Nitrogen supply                   | T  | Supply of nutrients for agroecosystem functioning |
| Alfalfa             | Soil structuring                  | E  | Erosion control                                   |
| Alfalfa             | Soil structuring                  | E  | Supply of nutrients for agroecosystem functioning |
| Alfalfa             | Soil structuring                  | E  | Regulation of water balance for crop development  |
| Alfalfa             | Deep nutrient capture             | E  | Supply of nutrients for agroecosystem functioning |
| Alfalfa             | Deep water capture                | T  | Regulation of water balance for crop development  |
| Alfalfa             | Weed control                      | Sp | Weed control                                      |
| Alfalfa             | Forage potential                  | E  | Food provision                                    |

|               |                             |    |                                                   |
|---------------|-----------------------------|----|---------------------------------------------------|
| Alfalfa       | Forage potential            | E  | Food provision                                    |
| Maize         | Food                        | T  | Food provision                                    |
| White mustard | Pollination                 | T  | Maintenance of associated biodiversity            |
| White mustard | Frost sensitive             | E  | Weed control                                      |
| White mustard | Pest control                | T  | Pest control                                      |
| White mustard | Pest control                | E  | Pest control                                      |
| White mustard | Pest control                | E  | Pest control                                      |
| White mustard | Soil structuring            | T  | Supply of nutrients for agroecosystem functioning |
| White mustard | Soil structuring            | T  | Erosion control                                   |
| White mustard | Soil structuring            | T  | Regulation of water balance for crop development  |
| White mustard | Weed control                | T  | Weed control                                      |
| White mustard | Weed control                | T  | Weed control                                      |
| White mustard | Soil fertility maintenance  | T  | Supply of nutrients for agroecosystem functioning |
| White mustard | Biomass                     | T  | Supply of nutrients for agroecosystem functioning |
| Onion         | Pollination                 | T  | Maintenance of associated biodiversity            |
| Onion         | Organoleptic quality        | E  | Food provision                                    |
| Onion         | Pest control                | Sp | Pest control                                      |
| Onion         | Easy to clean               | E  | Regulation of greenhouse gases                    |
| Spring barley | Biomass                     | T  | Supply of nutrients for agroecosystem functioning |
| Phacelia      | Beauty                      | E  | Cultural                                          |
| Phacelia      | Soil structuring            | T  | Supply of nutrients for agroecosystem functioning |
| Phacelia      | Soil structuring            | T  | Erosion control                                   |
| Phacelia      | Soil structuring            | T  | Regulation of water balance for crop development  |
| Phacelia      | Ground cover                | T  | Supply of nutrients for agroecosystem functioning |
| Phacelia      | Pest control                | T  | Pest control                                      |
| Phacelia      | Pollination                 | T  | Maintenance of associated biodiversity            |
| Phacelia      | Pollination                 | T  | Maintenance of associated biodiversity            |
| Phacelia      | Pollination                 | T  | Maintenance of associated biodiversity            |
| Phacelia      | Biomass                     | T  | Supply of nutrients for agroecosystem functioning |
| Phacelia      | Biomass                     | T  | Supply of nutrients for agroecosystem functioning |
| Leek          | Food supply                 | T  | Food provision                                    |
| Leek          | Allelopathy                 | Sp | Weed control                                      |
| Leek          | Allelopathy                 | Sp | Pest control                                      |
| Pea           | Food                        | E  | Food provision                                    |
| Pea           | Nitrogen supply to the soil | T  | Supply of nutrients for agroecosystem functioning |
| Pea           | Nitrogen supply to the soil | T  | Supply of nutrients for agroecosystem functioning |
| Pea           | Forage potential            | T  | Food provision                                    |

|                  |                             |    |                                                   |
|------------------|-----------------------------|----|---------------------------------------------------|
| Potato           | Gastronomy/Heritage         | E  | Cultural                                          |
| Potato           | Pest control                | Sp | Pest control                                      |
| Potato           | Organic matter return       | Sp | Supply of nutrients for agroecosystem functioning |
| Potato           | Energy source               | T  | Food provision                                    |
| Potato           | Energy source               | T  | Food provision                                    |
| Potato           | Energy source               | T  | Food provision                                    |
| Potato           | Energy source               | T  | Food provision                                    |
| Quinoa           | Soil restitution            | Sp | Supply of nutrients for agroecosystem functioning |
| Quinoa           | Weed control                | Sp | Weed control                                      |
| Chinese radish   | Aeration                    | E  | Supply of nutrients for agroecosystem functioning |
| Chinese radish   | Aeration                    | E  | Regulation of water balance for crop development  |
| Chinese radish   | Aeration                    | E  | Erosion control                                   |
| Chinese radish   | Minimal soil work           | E  | Regulation of greenhouse gases                    |
| Chinese radish   | Minimal soil work           | E  | Erosion control                                   |
| Chinese radish   | Strong rooting              | T  | Regulation of water balance for crop development  |
| Forage radish    | Ground cover                | E  | Erosion control                                   |
| Forage radish    | Ground cover                | E  | Pest control                                      |
| Forage radish    | Ground cover                | E  | Maintenance of water quality                      |
| Forage radish    | Soil restitution            | E  | Supply of nutrients for agroecosystem functioning |
| Forage radish    | Allelopathy                 | E  | Weed control                                      |
| English ryegrass | Ground cover                | T  | Supply of nutrients for agroecosystem functioning |
| English ryegrass | Ground cover                | T  | Pest control                                      |
| English ryegrass | Ground cover                | T  | Maintenance of water quality                      |
| English ryegrass | Ground cover                | T  | Erosion control                                   |
| English ryegrass | Root biomass                | T  | Supply of nutrients for agroecosystem functioning |
| Sainfoin         | Pollination                 | T  | Maintenance of associated biodiversity            |
| Sainfoin         | Drought-adapted             | E  | Regulation of water balance for crop development  |
| Sainfoin         | Forage potential            | Sp | Food provision                                    |
| Sainfoin         | Weed control                | Sp | Weed control                                      |
| Sainfoin         | Nitrogen supply to the soil | T  | Supply of nutrients for agroecosystem functioning |
| Buckwheat        | Food                        | T  | Food provision                                    |
| Buckwheat        | Weed control                | T  | Weed control                                      |
| Buckwheat        | Weed control                | T  | Weed control                                      |
| Buckwheat        | Weed control                | T  | Weed control                                      |
| Buckwheat        | Gastronomy/Heritage         | E  | Cultural                                          |
| Buckwheat        | Low input consumption       | E  | Maintenance of water quality                      |
| Buckwheat        | Low input consumption       | E  | Regulation of greenhouse gases                    |

|                 |                             |    |                                                   |
|-----------------|-----------------------------|----|---------------------------------------------------|
| Buckwheat       | Low soil work requirement   | Sp | Regulation of greenhouse gases                    |
| Rye             | Deep root system            | T  | Supply of nutrients for agroecosystem functioning |
| Rye             | Deep root system            | T  | Regulation of water balance for crop development  |
| Rye             | Ground cover                | T  | Supply of nutrients for agroecosystem functioning |
| Rye             | Ground cover                | T  | Weed control                                      |
| Rye             | Ground cover                | T  | Maintenance of water quality                      |
| Rye             | Ground cover                | T  | Erosion control                                   |
| Forage sorghum  | Leaching attenuation        | E  | Supply of nutrients for agroecosystem functioning |
| Forage sorghum  | Leaching attenuation        | E  | Maintenance of water quality                      |
| Forage sorghum  | Forage potential            | E  | Food provision                                    |
| Sunflower       | Pollination                 | T  | Maintenance of associated biodiversity            |
| Sunflower       | Pollination                 | T  | Maintenance of associated biodiversity            |
| Sunflower       | Food                        | T  | Food provision                                    |
| Sunflower       | Food                        | T  | Food provision                                    |
| White clover    | Perennial - cover           | T  | Supply of nutrients for agroecosystem functioning |
| White clover    | Perennial - cover           | T  | Maintenance of water quality                      |
| White clover    | Perennial - cover           | T  | Weed control                                      |
| White clover    | Perennial - cover           | T  | Erosion control                                   |
| White clover    | Perennial - cover           | T  | Supply of nutrients for agroecosystem functioning |
| White clover    | Perennial - cover           | T  | Maintenance of water quality                      |
| White clover    | Perennial - cover           | T  | Weed control                                      |
| White clover    | Perennial - cover           | T  | Erosion control                                   |
| White clover    | Surface roots               | T  | Supply of nutrients for agroecosystem functioning |
| White clover    | Association with rapeseed   | E  | Supply of nutrients for agroecosystem functioning |
| Egyptian clover | Forage potential            | E  | Food provision                                    |
| Egyptian clover | Nitrogen supply to the soil | T  | Supply of nutrients for agroecosystem functioning |
| Crimson clover  | Nitrogen supply to the soil | T  | Supply of nutrients for agroecosystem functioning |
| Crimson clover  | Forage potential            | E  | Food provision                                    |
| Red clover      | Nitrogen supply to the soil | T  | Supply of nutrients for agroecosystem functioning |
| Red clover      | Nitrogen supply to the soil | T  | Supply of nutrients for agroecosystem functioning |
| Red clover      | Forage potential            | E  | Food provision                                    |
| Triticale       | Forage potential            | E  | Food provision                                    |
| Triticale       | Biomass                     | T  | Supply of nutrients for agroecosystem functioning |
| Vetch           | Forage potential            | E  | Food provision                                    |
| Vetch           | Nitrogen supply to the soil | T  | Supply of nutrients for agroecosystem functioning |
